# Supplementary material for: An Independent Assessment of a Commercial Clinical Interpretation Software Indicates That Software Can Mitigate Variation in Human Assessment
Source: MDPI journal article supplement (doi:10.3390/jmp3030012), 2022-07-05
Supplement: s1 [file jmp-1737526-supplementary.xlsx]

## Sheet: Table S1 - Heme
Case number	Diagnosis	Gene	Transcript	c.	p.	Classification (QCI+user)	Tier (QCI+user)	Tier (QCI expert)	Tier (submitting lab)	Tier (lab 2)	Discrepant?	Resolution	Technical discrepancy	QCI vs submiting lab	Human reviewer discrepancy	Remain discrepant?
haem_case_1	Acute myeloid leukemia	DNMT3A	NM_022552	c.1367_1368delAG	p.Lys456Thrfs*16	Likely Pathogenic	1A		1A		no		no	no	no	no
haem_case_1	Acute myeloid leukemia	DNMT3A	NM_022552	c.2385G>A	p.Trp795*				1A		yes	<5% - filtered out	yes	n/a	n/a	no - technical
haem_case_1	Acute myeloid leukemia	SF3B1	NM_012433	c.2098A>G	p.Lys700Glu	Pathogenic	2C	3	1A		yes	resolved by expert panel - agree with QCI	no	yes	yes	no - expert agreed with QCI
haem_case_1	Acute myeloid leukemia	KIT	NM_000222	c.2447A>T	p.Asp816Val	Pathogenic	1A		1A		no		no	no	no	no
haem_case_1	Acute myeloid leukemia	RUNX1	NM_001754	c.1057_1076delTTCACCTACTCCCCGACGCC	p.Phe353Glyfs*195	Likely Pathogenic	1A		1A		no		no	no	no	no
haem_case_1	Acute myeloid leukemia	RUNX1	NM_001754	c.329A>G	p.Lys110Arg	Likely Pathogenic	1A		1A		no		no	no	no	no
haem_case_1	Acute myeloid leukemia	BCOR	NM_017745	c.1464_1503dupTCCTCCAGGAAATGGTTGTGCTATCTATAGATCTGAAATC	p.Ile502Serfs*10	Likely Pathogenic	2C	1	1A		yes	resolved by QCI expert review	no	yes	yes	no - QCI One expert review resolved
haem_case_2	Myelodysplastic syndrome	SF3B1	NM_012433	c.2098A>G	p.Lys700Glu	Pathogenic	1A		1A		no		no	no	no	no
haem_case_2	Myelodysplastic syndrome	IDH2	NM_002168	c.419G>A	p.Arg140Gln	Pathogenic	1A		1A		no		no	no	no	no
haem_case_2	Myelodysplastic syndrome	RUNX1	NM_001754	c.317G>A	p.Trp106*				1A		yes	<5% - filtered out	yes	n/a	n/a	no - technical
haem_case_3	Chronic myelomonocytic leukemia	TET2	NM_001127208	c.1918C>T	p.Gln640*	Likely Pathogenic	1A		1A	2C	yes	resolved by expert panel - agree with QCI	no	no	yes	no - expert agreed with QCI and submitting lab
haem_case_3	Chronic myelomonocytic leukemia	TET2	NM_001127208	c.3955-1G>A	n/a	Likely Pathogenic	1A		1A	3	yes	resolved by expert panel - agree with QCI	no	no	yes	no - expert agreed with QCI and submitting lab
haem_case_3	Chronic myelomonocytic leukemia	SRSF2	NM_003016	c.284C>G	p.Pro95Arg	Pathogenic	1A	1	1A		no		no	no	no	no
haem_case_3	Chronic myelomonocytic leukemia	TET2	NM_001127208	c.4178C>T	p.Thr1393Ile				1A		yes	<5% - filtered out	yes	n/a	n/a	no - technical
haem_case_4	Myelodysplastic syndrome	PTPN11	NM_002834	c.226G>A	p.Glu76Lys	Pathogenic	1A	2	2D	1B	yes	no overall agreement reached	no	yes	yes	yes - no agreement with experts
haem_case_4	Myelodysplastic syndrome	U2AF1	NM_006758	c.470A>G	p.Gln157Arg	Pathogenic	1A	1	1A	2	yes	resolved by expert panel - agree with QCI	no	no	yes	no - expert agreed with QCI and submitting lab
haem_case_4	Myelodysplastic syndrome	U2AF1	NM_006758	c.101C>T	p.Ser34Phe	Pathogenic	1A	1	1A	2	yes	resolved by expert panel - agree with QCI	no	no	yes	no - expert agreed with QCI and submitting lab
haem_case_5	Myelodysplastic syndrome	TET2	NM_001127208	c.2852_2859delCTCTAAGG	p.Ala951Valfs*18	Likely Pathogenic	1A		1A		no		no	no	no	no
haem_case_6	Acute myeloid leukemia	TET2	NM_001127208	c.2692G>T	p.Gly898*	Pathogenic	2C	2	1		yes	no overall agreement reached	no	yes	yes	yes - no agreement with experts
haem_case_6	Acute myeloid leukemia	CEBPA	NM_004364	c.938dupA	p.Val314Glyfs*7	Likely Pathogenic	1A		1		no		no	no	no	no
haem_case_7	Myelofibrosis/AML	EZH2	NM_004456	c.2029+2T>C	n/a	Likely Pathogenic	2C		1	1A	yes	resolved by expert panel - agree with lab	no	yes	no	yes - expert agreed with submitting lab
haem_case_7	Myelofibrosis/AML	IDH2	NM_002168	c.419G>A	p.Arg140Gln	Pathogenic	1A		1	1A	no		no	no	no	no
haem_case_7	Myelofibrosis/AML	ASXL1	NM_015338	c.1934dupG	p.Gly646Trpfs*12	Pathogenic	1A		1	1A	no		no	no	no	no
haem_case_7	Myelofibrosis/AML	STAG2	NM_006603	c.2096+1G>A	n/a	Likely Pathogenic	2C		1	1B	yes	resolved by expert panel - agree with lab	no	yes	no	yes - expert agreed with submitting lab
haem_case_8	Myelodysplastic syndrome	SRSF2	NM_003016	c.284C>T	p.Pro95Leu	Pathogenic	1A		1	1B	no		no	no	no	no
haem_case_8	Myelodysplastic syndrome	ASXL1	NM_015338	c.1900_1922delAGAGAGGCGGCCACCACTGCCAT	p.Glu635Argfs*15	Pathogenic	1A		1		no		no	no	no	no
haem_case_8	Myelodysplastic syndrome	ASXL1	NM_015338	c.1900_1927delAGAGAGGCGGCCACCACTGCCATCGGAGinsCGGA	p.Glu635_Gly643delinsArg	Likely Pathogenic	1A		1		no		no	no	no	no
haem_case_8	Myelodysplastic syndrome	RUNX1	NM_001754	c.1412_1413delGC	p.Arg471Profs*83	Likely Pathogenic	1A		1		no		no	no	no	no
haem_case_8	Myelodysplastic syndrome	RUNX1	NM_001754	c.508+2T>G	n/a	Likely Pathogenic	1A		1		no		no	no	no	no
haem_case_9	Chronic myelomonocytic leukemia	TET2	NM_001127208	c.1897dupA	p.Met633Asnfs*5	Likely Pathogenic	1A	2	1	2C	yes	no overall agreement reached	no	no	yes	no - expert agreed with QCI and submitting lab
haem_case_9	Chronic myelomonocytic leukemia	TET2	NM_001127208	c.2243T>A	p.Leu748*	Likely Pathogenic	1A	2	1	2C	yes	no overall agreement reached	no	no	yes	no - expert agreed with QCI and submitting lab
haem_case_9	Chronic myelomonocytic leukemia	SRSF2	NM_003016	c.284C>T	p.Pro95Leu	Pathogenic	1A		1	1B	no		no	no	no	no
haem_case_9	Chronic myelomonocytic leukemia	FLT3	NM_004119	c.2503G>T	p.Asp835Tyr				1	1B	yes	<5% - filtered out	yes	no	no	no - technical
haem_case_10	Acute myeloid leukemia	TET2	NM_001127208	c.3803_3803+5delAGTAAG	n/a	Likely Pathogenic	2C		1	2	yes	no overall agreement reached	no	yes	yes	yes - no agreement with experts
haem_case_10	Acute myeloid leukemia	EZH2	NM_004364	c.2090delA	p.Asn697Ilefs*9	Likely Pathogenic	2C	3	1	not reported	yes	resolved by expert panel - agree with lab	no	yes	yes	yes - expert agreed with submitting lab
haem_case_10	Acute myeloid leukemia	ASXL1	NM_015338	c.1900_1922delAGAGAGGCGGCCACCACTGCCAT	p.Glu635Argfs*15	Pathogenic	1A		1	2	yes	resolved by expert panel - agree with QCI	no	no	yes	no - expert agreed with QCI and submitting lab
haem_case_10	Acute myeloid leukemia	NRAS	NM_002524	c.35G>A	p.Gly12Asp				1	not reported	yes	low quality - filtered out	yes	no	no	no - technical
haem_case_11	Acute myeloid leukemia	RUNX1	NM_001754	c.1140_1141insG	p.Leu381Alafs*174	Likely Pathogenic	1A		2		yes	resolved by expert panel - agree with QCI	no	yes	yes	no - expert agreed with QCI
haem_case_11	Acute myeloid leukemia	ASXL1	NM_015338	c.1903G>T	p.Glu635*	Likely Pathogenic	1A		2		yes	resolved by expert panel - agree with QCI	no	yes	yes	no - expert agreed with QCI
haem_case_11	Acute myeloid leukemia	RUNX1	NM_001754	c.1140C>G	p.Tyr380*	Likely Pathogenic	1A		2		yes	resolved by expert panel - agree with QCI	no	yes	yes	no - expert agreed with QCI
haem_case_11	Acute myeloid leukemia	BCOR	NM_017745	c.4439_4443delGACAC	p.Arg1480Profs*3	Likely Pathogenic	2C		2		no		no	no	no	no
haem_case_11	Acute myeloid leukemia	RUNX1	NM_001754	c.836G>A	p.Trp279*				2		yes	<5% - filtered out	yes	no	no	no - technical
haem_case_11	Acute myeloid leukemia	BCOR	NM_017745	c.3586_3587insCTGGA	p.Gly1196Alafs*10	Likely Pathogenic	2C		2		no		no	no	no	no
haem_case_12	Myelodysplastic syndrome	TP53	NM_000546	c.273G>A	p.Trp91*	Pathogenic	1A		2C		yes	resolved by expert panel - agree with QCI	no	yes	yes	no - expert agreed with QCI
haem_case_12	Myelodysplastic syndrome	TP53	NM_000546	c.742C>T	p.Arg248Trp	Pathogenic	1A		1		no		no	no	no	no
haem_case_13	Myeloproliferative neoplasm	TET2	NM_001127208	c.2554G>T	p.Glu852*	Likely Pathogenic	1A	3	2C	not reported	yes	no overall agreement reached	no	yes	yes	yes - no agreement with experts
haem_case_13	Myeloproliferative neoplasm	TET2	NM_001127208	c.5456delT	p.Leu1819*	Likely Pathogenic	1A	3	3	not reported	yes	resolved by QCI expert review	no	yes	no	no - QCI One expert review resolved
haem_case_13	Myeloproliferative neoplasm	ASXL1	NM_015338	c.1934dupG	p.Gly646Trpfs*12	Pathogenic	1A		1B		no		no	no	no	no
haem_case_14	Acute myeloid leukemia	TP53	NM_000546	c.683_686delACTG	p.Asp228Valfs*18	Pathogenic	1A		2D		yes	resolved by expert panel - agree with QCI	no	yes	yes	no - expert agreed with QCI
haem_case_14	Acute myeloid leukemia	TP53	NM_000546	c.643A>G	p.Ser215Gly	Pathogenic	1A		2D		yes	resolved by expert panel - agree with QCI	no	yes	yes	no - expert agreed with QCI
haem_case_15	Acute myeloid leukemia	KRAS	NM_004985	c.38G>A	p.Gly13Asp	Pathogenic	2C		1B		yes	resolved by expert panel - agree with QCI	no	yes	yes	no - expert agreed with QCI
haem_case_16	Myelofibrosis (Mycosis fungoides)	U2AF1	NM_006758	c.470A>C	p.Gln157Pro	Pathogenic	3		1		yes	disease mapping	mapping	yes	n/a	no - mapping issue
haem_case_18	Acute myeloid leukemia	FLT3	NM_004119	c.2509A>C	p.Met837Leu	Likely Pathogenic	1A		1A		no		no	no	no	no
haem_case_18	Acute myeloid leukemia	IDH2	NM_002168	c.419G>A	p.Arg140Gln	Pathogenic	1A		1A		no		no	no	no	no
haem_case_18	Acute myeloid leukemia	DNMT3A	NM_022552	c.2644C>T	p.Arg882Cys	Pathogenic	1A		1A		no		no	no	no	no
haem_case_18	Acute myeloid leukemia	KMT2A	NM_005933	c.432+2T>G	n/a	Likely Pathogenic	2C		not reported		yes	resolved by expert panel - agree with lab	no	yes	yes	yes - expert agreed with submitting lab
haem_case_18	Acute myeloid leukemia	NPM1	NM_002520	c.859_806insTCTG	p.Trp288Cysfs*12	NA	NA		1A	not in data	yes	not in submitted data	yes	n/a	n/a	no - technical
haem_case_19	Myelofibrosis	JAK2	NM_004972	c.1849G>T	p.Val617Phe	Pathogenic	2C	2	1A		yes	disease mapping	mapping	n/a	n/a	no - mapping issue
haem_case_19	Myelofibrosis	SRSF2	NM_003016	c.284C>T	p.Pro95Leu	Pathogenic	2C		2C		no		no	no	no	no
haem_case_19	Myelofibrosis	U2AF1	NM_006758	c.470A>G	p.Gln157Arg	Pathogenic	3	3	1B/2C		yes	disease mapping	mapping	n/a	n/a	no - mapping issue
haem_case_20	Polycythemia vera	JAK2	NM_004972	c.1849G>T	p.Val617Phe	Pathogenic	1A		1A		no		no	no	no	no
haem_case_20	Polycythemia vera	TET2	NM_001127208	c.3996_3997insA	p.Met1333Asnfs*6				1B		yes	not in submitted data	yes	n/a	n/a	no - technical
haem_case_20	Polycythemia vera	ASXL1	NM_015338	c.1926_1927insG	p.Gly646Trpfs*12				1B		yes	not in submitted data	yes	n/a	n/a	no - technical
haem_case_24	Effusion lymphoma	MAP2K1	NM_002755	c.157T>C	p.Phe53Leu	Pathogenic	2C		n/a	not reported	yes	resolved by expert panel - agree with QCI	no	yes	yes	no - expert agreed with QCI
haem_case_24	Effusion lymphoma	EZH2	NM_004456	c.1937A>T	p.Tyr646Phe	Pathogenic	2C		n/a	2C	no		no	no	no	no
haem_case_26	Chronic myelomonocytic leukemia	DNMT3A	NM_022552	c.2645G>A	p.Arg882His	Pathogenic	2		2		no		no	no	no	no
haem_case_26	Chronic myelomonocytic leukemia	TET2	NM_001127208	c.1630C>T	p.Arg544*	Pathogenic	2		2		no		no	no	no	no
haem_case_26	Chronic myelomonocytic leukemia	TET2	NM_001127208	c.1701delG	p.Lys568Argfs*12	Likely Pathogenic	2		2		no		no	no	no	no
haem_case_26	Chronic myelomonocytic leukemia	ZRSR2	NM_005089	c.96_97insA	p.Glu33Argfs*22	Likely Pathogenic	2		2C		no		no	no	no	no
haem_case_26	Chronic myelomonocytic leukemia	BCOR	NM_001123385	c.4428+1G>A	n/a	NA	NA		2C	not in data	yes	not in submitted data	yes	n/a	n/a	no - technical
haem_case_27	Myelofibrosis	TET2	NM_001127208	c.2637delT	p.His880Thrfs*41	Likely Pathogenic	2C		2C		no		no	no	no	no
haem_case_27	Myelofibrosis	JAK2	NM_004972	c.1849G>T	p.Val617Phe	Pathogenic	2C	2	1	1	yes	disease mapping	mapping	n/a	n/a	no - mapping issue
haem_case_27	Myelofibrosis	U2AF1	NM_006758	c.470A>G	p.Gln157Arg	Pathogenic	3	3	2	2	yes	disease mapping	mapping	n/a	n/a	no - mapping issue
haem_case_28	MDS/MPN, unclassifiable	CBL	NM_005188	c.1084_1092delAAAGTGACC	p.Lys362_Thr364del	Likely Pathogenic	1A		3		yes	resolved by expert panel - agree with lab	no	yes	no	yes - expert agreed with submitting lab
haem_case_28	MDS/MPN, unclassifiable	TET2	NM_001127208	c.5231dupT	p.Ser1745Glufs*8	Likely Pathogenic	1A		1A	1A	no		no	no	no	no
haem_case_28	MDS/MPN, unclassifiable	EZH2	NM_004456	c.2069G>A	p.Arg690His	Pathogenic	1A		2C	1B	yes	resolved by expert panel - agree with QCI	no	yes	yes	no - expert agreed with QCI
haem_case_28	MDS/MPN, unclassifiable	ZRSR2	NM_005089	c.376C>T	p.Arg126*	Pathogenic	1A		1A	1A	no		no	no	no	no
haem_case_28	MDS/MPN, unclassifiable	ASXL1	NM_015338	c.2077C>T	p.Arg693*	Pathogenic	1A		1A	1A	no		no	no	no	no
haem_case_28	MDS/MPN, unclassifiable	RUNX1	NM_001754	c.610C>T	p.Arg204*	Pathogenic	1A		1A	1A	no		no	no	no	no
haem_case_29	Acute myeloid leukemia	SF3B1	NM_012433	c.2098A>G	p.Lys700Glu	Pathogenic	2C		2C		no		no	no	no	no
haem_case_29	Acute myeloid leukemia	IDH1	NM_005896	c.394C>G	p.Arg132Gly	Pathogenic	1A		1A		no		no	no	no	no
haem_case_29	Acute myeloid leukemia	JAK2	NM_004972	c.1849G>T	p.Val617Phe	Pathogenic	2C		2C		no		no	no	no	no
haem_case_29	Acute myeloid leukemia	STAG2	NM_006603	c.990del	p.Lys330Asnfs*14	NA	NA		2C	not in data	yes	not in submitted data	yes	n/a	n/a	no - technical
haem_case_30	Acute myeloid leukemia	TP53	NM_000546	c.722C>T	p.Ser241Phe	Pathogenic	1A		1A	1A	no		no	no	no	no
haem_case_30	Acute myeloid leukemia	TP53	NM_000546	c.574C>T	p.Gln192*	Pathogenic	1A		1A	1A	no		no	no	no	no
haem_case_31	Chronic myelomonocytic leukemia	KRAS	NM_004985	c.34G>C	p.Gly12Arg	Pathogenic	1A	2	2	2C	yes	resolved by QCI expert review	no	yes	no	no - QCI One expert review resolved
haem_case_31	Chronic myelomonocytic leukemia	TET2	NM_001127208	c.5125delT	p.Cys1709Valfs*10	Likely Pathogenic	1A	2	3	3	yes	no overall agreement reached	no	yes	yes	yes - no agreement with experts
haem_case_31	Chronic myelomonocytic leukemia	SRSF2	NM_003016	c.284C>T	p.Pro95Leu	Pathogenic	1A		1B	1A	no		no	no	no	no
haem_case_31	Chronic myelomonocytic leukemia	TET2	NM_001127208	c.1842dupG	p.Leu615Alafs*23	Pathogenic	1A	2	2	2	yes	no overall agreement reached	no	yes	yes	yes - no agreement with experts
haem_case_33	Myelofibrosis (Mycosis fungoides)	CALR	NM_004343	c.1099_1150delCTTAAGGAGGAGGAAGAAGACAAGAAACGCAAAGAGGAGGAGGAGGCAGAGG	p.Leu367Thrfs*46	Pathogenic	3	2	1A	1A	yes	disease mapping	mapping	yes	n/a	no - mapping issue
haem_case_33	Myelofibrosis (Mycosis fungoides)	ASXL1	NM_015338	c.1934dupG	p.Gly646Trpfs*12	Pathogenic	2C		2C	2C	no		no	no	no	no
haem_case_34	Recurrent acute myeloid leukemia	NPM1	NM_002520	c.863_864insCCTG	p.Trp288Cysfs*12	Likely Pathogenic	1A		1A	1A	no		no	no	no	no
haem_case_34	Recurrent acute myeloid leukemia	WT1	NM_024426	c.1145_1157dupCTCTTGTACGGTC	p.Ala387Leufs*7	Pathogenic	2C		not reported		yes	resolved by expert panel - agree with QCI	yes	n/a	n/a	no - technical
haem_case_34	Recurrent acute myeloid leukemia	FLT3	NM_004119	c.1796_1813dupATGATCTCAAATGGGAGT	p.Tyr599_Glu604dup	Pathogenic	1A		1A		no		no	no	no	no

## Sheet: Table S2 - Solid tumors
Case number	Diagnosis	Gene	Transcript	c.	p.	Tier (QCI+user)	Tier (QCI expert)	Tier (submitting lab)	Tier (lab 2)	Resolution	Discrepant	Technical discrepancy	QCI vs submiting lab	Human reviewer discrepancy	Remain discrepant?
_tumour_1	Metastatic GIST	several	N/A	not listed: 20 variants tier I and II all low variant allele frequency				n/a		agreed as artifact by expert panel	yes	yes	n/a - not reported by submitting lab	n/a - not reported by submitting lab	no - technical
_tumour_1	Metastatic GIST	KIT	NM_000222	c.1729_1767dupCCTTATGATCACAAATGGGAGTTTCCCAGAAACAGGCTG	p.Pro577_Leu589dup	1A		1A	1A		no	no	no	no	no
_tumour_2	Gastrointestinal stromal tumour (GIST)	KIT	NM_000222	c.1504_1509dupGCCTAT	p.Ala502_Tyr503dup	1A		1A			no	no	no	no	no
_tumour_3	Metastatic malignant melanoma	NBN	NM_002485	c.687_688insCCAA	p.Leu230Profs*8	2C		n/a		agreed as artifact by expert panel	yes	yes	n/a - not reported by submitting lab	n/a - not reported by submitting lab	no - technical
_tumour_3	Metastatic malignant melanoma	TSC1	NM_000368	c.2632G>T	p.Glu878*	2C		n/a		agreed as artifact by expert panel	yes	yes	n/a - not reported by submitting lab	n/a - not reported by submitting lab	no - technical
_tumour_3	Metastatic malignant melanoma	CDKN2A	NM_000077	c.172C>T	p.Arg58*	2C		n/a		agreed as artifact by expert panel	yes	yes	n/a - not reported by submitting lab	n/a - not reported by submitting lab	no - technical
_tumour_3	Metastatic malignant melanoma	NRAS	NM_002524	c.182A>G	p.Gln61Arg	1A		1A			no	no	no	no	no
_tumour_4	Gastrointestinal stromal tumour (GIST)	PDGFRA	NM_006206	c.2525A>T	p.Asp842Val	1A		1A			no	no	no	no	no
_tumour_4	Gastrointestinal stromal tumour (GIST)	several	N/A	not listed - 21 variants tier I and II all low variant allele frequency				n/a		agreed as artifact by expert panel	yes	yes	n/a - not reported by submitting lab	n/a - not reported by submitting lab	no - technical
_tumour_6	Non small cell lung carcinoma	EGFR	NM_005228	c.2399A>G	p.Asp800Gly	1B	3	3	3	resolved by expert review	yes	no	yes	no	no - QCI One expert review resolved
_tumour_6	Non small cell lung carcinoma	PIK3CA	NM_006218	c.1633G>A	p.Glu545Lys	2C		2C	2C		no	no	no	no	no
_tumour_7	Colorectal cancer	TP53	NM_000546	c.479_483delTGGCC	p.Met160Asnfs*19	2C	2	not reported	3	agreed as 2C by expert panel	yes	no	yes	no	no - expert agreed with QCI
_tumour_7	Colorectal cancer	BRAF	NM_004333	c.1786G>C	p.Gly596Arg	1A	2	2D	1B	agreed as 1 by expert panel	yes	no	yes	yes	no - expert agreed with QCI and lab 2
_tumour_7	Colorectal cancer	TP53	NM_000546	c.475_477delGCC	p.Ala159del	2C	2	not reported	3	agreed as 2C by expert panel	yes	no	yes	no	no - expert agreed with QCI
_tumour_8	Metastatic melanoma	PTEN	NM_000314	c.493G>C	p.Gly165Arg	2C		2	2D		no	no	no	no	no
_tumour_10	Melanoma	BRAF	NM_004333	c.1780G>A	p.Asp594Asn	2C	2	3	2C	agreed as 2C by expert panel	yes	no	yes	yes	no - expert agreed with QCI and lab 2
_tumour_10	Melanoma	NRAS	NM_002524	c.181C>A	p.Gln61Lys	1A	2	not reported	2	resolved by expert review	yes	no	yes	yes	no - QCI One expert review resolved to agree with lab 2
_tumour_11	Non small cell lung carcinoma	TP53	NM_000546	c.783-1G>T	n/a	2C	2	not reported		agreed as 2C by expert panel	yes	no	yes	n/a	no - expert agreed with QCI
_tumour_11	Non small cell lung carcinoma	EGFR	NM_005228	c.2240_2257del	p.Leu747_Pro753delinsSer	1A		1A	1A		no	no	no	no	no
_tumour_12	Metastatic adenocarcinoma in keeping with colorectal primary	NRAS	NM_002524	c.37G>C	p.Gly13Arg	2C	1	1A	1A	resolved by expert review	yes	no	yes	no	no - QCI One expert review resolved
_tumour_12	Metastatic adenocarcinoma in keeping with colorectal primary	FGFR3	NM_000142	c.1212A>C	p.Lys404Asn	2C		n/a		agreed as artifact by expert panel	yes	yes	n/a - not reported by submitting lab	n/a - not reported by submitting lab	no - technical
_tumour_12	Metastatic adenocarcinoma in keeping with colorectal primary	TP53	NM_000546	c.811G>A	p.Glu271Lys	2C		2C	not reported	agreed as 2C by expert panel	yes	no	no	yes	no - expert agreed with QCI and lab 1
_tumour_13	Oncocytoid carcinoma with metastasis from previous salivary gland primary	FGFR3	NM_000142	c.1212A>C	p.Lys404Asn	2C		n/a		agreed as artifact by expert panel	yes	yes	n/a - not reported by submitting lab	n/a - not reported by submitting lab	no - technical
_tumour_13	Oncocytoid carcinoma with metastasis from previous salivary gland primary	PIK3CA	NM_006218	c.1634A>C	p.Glu545Ala	2C		2			no	no	no	no	no
_tumour_13	Oncocytoid carcinoma with metastasis from previous salivary gland primary	HRAS	NM_005343	c.182A>G	p.Gln61Arg	2C		2			no	no	no	no	no
_tumour_14	Lung cancer	FGFR3	NM_000142	c.1212A>C	p.Lys404Asn	2C		n/a		agreed as artifact by expert panel	yes	yes	n/a - not reported by submitting lab	n/a - not reported by submitting lab	no - technical
_tumour_14	Lung cancer	ALK	NM_004304	c.3587T>A	p.Leu1196Gln	2C	1	1A		resolved by expert review	yes	no	yes	n/a	no - QCI One expert review resolved
_tumour_14	Lung cancer	several	N/A	not listed - 33 variants tier I and II all low variant allele frequency				n/a		agreed as artifact by expert panel	yes	yes	n/a - not reported by submitting lab	n/a - not reported by submitting lab	no - technical
_tumour_15	Adenoid cystic carcinoma	several	N/A	not listed - 10 variants tier I and II all low variant allele frequency				n/a		agreed as artifact by expert panel	yes	yes	n/a - not reported by submitting lab	n/a - not reported by submitting lab	no - technical
_tumour_16	Breast cancer	PIK3CA	NM_006218	c.3140A>G	p.His1047Arg	2C	1	1A		resolved by expert review	yes	no	yes	n/a	no - QCI One expert review resolved
_tumour_17	Breast cancer	PIK3CA	NM_006218	c.1035T>A	p.Asn345Lys	2C		2			no	no	no	no	no
_tumour_21	Melanoma	BRAF	NM_004333	c.1789_1790delCTinsGA	p.Leu597Glu	2C		2C	2C		no	no	no	no	no
_tumour_25	Lung cancer	EGFR	NM_005228	c.2252_2275delCATCTCCGAAAGCCAACAAGGAAA	p.Thr751_Glu758del	1A		1A			no	no	no	no	no
_tumour_27	Lung cancer	EGFR	NM_005228	c.2284-5_2290dupTCCAGGAAGCCT	p.Tyr764_Val765insPheGlnGluAla	not reported		1A	1A	filtered out as covers intron	yes	yes	n/a - filtered out by QCI	n/a - filtered out by QCI	no - technical
_tumour_28	Lung cancer	EGFR	NM_005228	c.2239_2247delTTAAGAGAA	p.Leu747_Glu749del	1A		1A	1A		no	no	no	no	no
_tumour_28	Lung cancer	EGFR	NM_005228	c.2248G>C	p.Ala750Pro	1A		1A	1A		no	no	no	no	no
_tumour_29	Lung cancer	EGFR	NM_005228	c.2302_2303insCCGTGGACA	p.Ala767_Ser768insThrValAsp	1A		1A			no	no	no	no	no
_tumour_29	Lung cancer	EGFR	NM_005228	c.2303G>A	p.Ser768Asn	1B		1A			no	no	no	no	no
_tumour_30	Lung cancer	EGFR	NM_005228	c.2156G>C	p.Gly719Ala	1A		1A			no	no	no	no	no
_tumour_31	Ovarian cancer	BRCA2	NM_000059	c.5576_5579delTTAA	p.Ile1859Lysfs*3	1A		1A			no	no	no	no	no
_tumour_32	Lung cancer	KRAS	NM_004985	c.34G>T	p.Gly12Cys	1A		1A	2C	agreed as 1B by expert panel	yes	no	no	yes	no - expert agreed with QCI and lab 1
_tumour_33	Colorectal cancer	BRAF	NM_004333	c.1781A>G	p.Asp594Gly	1A	2	2	2D	resolved by expert review	yes	no	yes	no	no - QCI One expert review resolved
_tumour_33	Colorectal cancer	NRAS	NM_002524	c.38G>A	p.Gly13Asp	1A		1A	1A		no	no	no	no	no
_tumour_34	Lung cancer	EGFR	NM_005228	c.2154_2155delGGinsCT	p.Gly719Cys	1A		1A	1A		no	no	no	no	no
_tumour_34	Lung cancer	EGFR	NM_005228	c.2303G>T	p.Ser768Ile	1A		1A	1A		no	no	no	no	no
_tumour_35	Gastrointestinal stromal tumour (GIST)	PDGFRA	NM_006206	c.1697_1711delGCCCAGATGGACATG	p.Ser566_Glu571delinsLys	1A		1A			no	no	no	no	no
_tumour_36	Ovarian cancer	ATR	NM_001184	c.2320dupA	p.Ile774Asnfs*3	2C		not reported		agreed as artifact by expert panel	yes	yes	n/a - not reported by submitting lab	n/a - not reported by submitting lab	no - technical
_tumour_36	Ovarian cancer	BRCA2	NM_000059	c.8021_8023delAGA	p.Lys2674del	1A	3	3 (VUS)		resolved by expert review	yes	no	yes	n/a	no - QCI One expert review resolved
_tumour_37	Lung cancer	JAK2	NM_004972	c.3188G>A	p.Arg1063His	2C	3	not reported		resolved by expert review	yes	no	yes	n/a	no - QCI One expert review resolved
_tumour_37	Lung cancer	PIK3CA	NM_006218	c.3140A>T	p.His1047Leu	2C		2C			no	no	no	no	no
_tumour_37	Lung cancer	EGFR	NM_005228	c.2303_2311dupGCGTGGACA	p.Ser768_Asp770dup	1A		1A			no	no	no	no	no
_tumour_38	Lung cancer	EGFR	NM_005228	c.2235_2249delGGAATTAAGAGAAGC	p.Glu746_Ala750del	1A		1A			no	no	no	no	no
_tumour_38	Lung cancer	EGFR	NM_005228	c.2369C>T	p.Thr790Met	1A		1A			no	no	no	no	no
_tumour_38	Lung cancer	TP53	NM_000546	c.81delT	p.Glu28Lysfs*16	2C		not reported		agreed as 2C by expert panel	yes	no	yes	n/a	no - expert agreed with QCI
_tumour_39	Gastrointestinal stromal tumour (GIST)	PDGFRA	NM_006206	c.1607T>A	p.Val536Glu	1A	1	2	2	agreed as 1 by expert panel	yes	no	yes	no	no - QCI One expert review resolved
_tumour_39	Gastrointestinal stromal tumour (GIST)	ATR	NM_001184	c.2320dupA	p.Ile774Asnfs*3	2C		n/a		agreed as artifact by expert panel	yes	yes	n/a - not reported by submitting lab	n/a - not reported by submitting lab	no - technical
_tumour_39	Gastrointestinal stromal tumour (GIST)	PDGFRA	NM_006206	c.2546A>G	p.Tyr849Cys	1A	2	2		resolved by expert review	yes	no	yes	n/a	no - QCI One expert review resolved
_tumour_40	Colorectal cancer	ATR	NM_001184	c.2320dupA	p.Ile774Asnfs*3	2C		n/a		agreed as artifact by expert panel	yes	yes	n/a - not reported by submitting lab	n/a - not reported by submitting lab	no - technical
_tumour_40	Colorectal cancer	KRAS	NM_004985	c.38G>A	p.Gly13Asp	1A		1A	1A		no	no	no	no	no
_tumour_40	Colorectal cancer	TP53	NM_000546	c.814G>T	p.Val272Leu	2C		not reported	2D	agreed as IIC by expert panel	yes	no	yes	yes	no - expert agreed with QCI and lab 2
_tumour_40	Colorectal cancer	APC	NM_000038	c.3927_3931delAAAGA	p.Glu1309Aspfs*4	2D		not reported		discrepant	yes	no	yes	n/a	yes
_tumour_40	Colorectal cancer	ARID1A	NM_006015	c.5192T>A	p.Leu1731*	2C		n/a		agreed as artifact by expert panel	yes	yes	n/a - not reported by submitting lab	n/a - not reported by submitting lab	no - technical
_tumour_41	Ovarian cancer	BRCA1	NM_007294	c.301+1G>A	n/a	1A		1A			no	no	no	no	no
_tumour_41	Ovarian cancer	TP53	NM_000546	c.184delG	p.Glu62Lysfs*61	2C		not reported		agreed as IIC by expert panel	yes	no	yes	n/a	no - expert agreed with QCI
_tumour_42	Melanoma	ATR	NM_001184	c.2320dupA	p.Ile774Asnfs*3	2C		n/a		agreed as artifact by expert panel	yes	yes	n/a - not reported by submitting lab	n/a - not reported by submitting lab	no - technical
_tumour_42	Melanoma	BRAF	NM_004333	c.1799T>A	p.Val600Glu	1A		1A			no	no	no	no	no
_tumour_42	Melanoma	EP300	NM_001429	c.631G>A	p.Gly211Ser	2C		not reported		discrepant	yes	no	yes	n/a	yes
_tumour_43	Lung cancer	CDKN2A	NM_000077	c.302G>T	p.Gly101Val	2C		not reported	2C		no	no	no	no	no
_tumour_43	Lung cancer	KRAS	NM_004985	c.34G>T	p.Gly12Cys	1A		2C		expert panel now agreed as IB (change since original data collected)	yes	no	yes	n/a	no - expert agreed with QCI
_tumour_43	Lung cancer	TP53	NM_000546	c.1024C>T	p.Arg342*	2C		3		agreed as IIC by expert panel	yes	no	yes	n/a	no - expert agreed with QCI
_tumour_44	Lung cancer	MET	NM_000245	c.504G>T	p.Glu168Asp	2C	3	not reported (VUS)		resolved by expert review	yes	no	yes	n/a	no - QCI One expert review resolved
_tumour_44	Lung cancer	TP53	NM_000546	c.784G>C	p.Gly262Arg	2C		3		agreed as IIC by expert panel	yes	no	yes	n/a	no - expert agreed with QCI
_tumour_44	Lung cancer	EGFR	NM_005228	c.2155G>T	p.Gly719Cys	1A		1A			no	no	no	no	no
_tumour_45	Breast cancer	PIK3CA	NM_006218	c.1634A>C	p.Glu545Ala	2C	1	1A		resolved by expert review	yes	no	yes	n/a	no - QCI One expert review resolved
_tumour_45	Breast cancer	TP53	NM_000546	c.818G>T	p.Arg273Leu	2C		3		agreed as IIC by expert panel	yes	no	yes	n/a	no - expert agreed with QCI
_tumour_46	Colorectal cancer	MSH6	NM_000179	c.2779dupA	p.Ile927Asnfs*8	2C		1A		discrepant	yes	no	yes	n/a	yes
_tumour_46	Colorectal cancer	MSH6	NM_000179	c.3037_3041delAAGAA	p.Lys1013Valfs*3	2C		1A		discrepant	yes	no	yes	n/a	yes
_tumour_46	Colorectal cancer	MSH6	NM_000179	c.3261delC	p.Phe1088Serfs*2	2C		not reported		discrepant - not of clinical significance (filtered our as artefact by most pipelines) as agreed by expert panel	yes	yes	yes	n/a	no - technical
_tumour_46	Colorectal cancer	BARD1	NM_000465	c.1911delA	p.Ala638Hisfs*76	2C		not reported		discrepant	yes	no	yes	n/a	yes
_tumour_46	Colorectal cancer	CTNNB1	NM_001904	c.121A>G	p.Thr41Ala	2C		not reported		discrepant	yes	no	yes	n/a	yes
_tumour_46	Colorectal cancer	PIK3CA	NM_006218	c.3140A>G	p.His1047Arg	2C		2C			no	no	no	no	no
_tumour_46	Colorectal cancer	FBXW7	NM_033632	c.1514G>A	p.Arg505His	2C		not reported		discrepant	yes	no	yes	n/a	yes
_tumour_46	Colorectal cancer	KRAS	NM_004985	c.436G>A	p.Ala146Thr	1A		1A			no	no	no	no	no
_tumour_46	Colorectal cancer	AKT1	NM_001014431	c.49G>A	p.Glu17Lys	2C		not reported		discrepant	yes	no	yes	n/a	yes
_tumour_46	Colorectal cancer	RNF43	NM_017763	c.1976delG	p.Gly659Valfs*41	2C		not reported		discrepant	yes	no	yes	n/a	yes
_tumour_47	Colorectal cancer	BRAF	NM_004333	c.1799T>A	p.Val600Glu	1A		1B			no	no	no	no	no
_tumour_47	Colorectal cancer	TP53	NM_000546	c.713G>A	p.Cys238Tyr	2C		3		agreed as IIC by expert panel	yes	no	yes	n/a	no - expert agreed with QCI
_tumour_47	Colorectal cancer	CHEK2	NM_007194	c.1116_1117delCAinsTG	p.Lys373Glu	2C	3	not reported		resolved by expert review	yes	no	yes	n/a	no - QCI One expert review resolved
_tumour_47	Colorectal cancer	APC	NM_000038	c.1690C>T	p.Arg564*	2C	3	not reported		resolved by expert review	yes	no	yes	n/a	no - QCI One expert review resolved
_tumour_47	Colorectal cancer	APC	NM_000038	c.4666dupA	p.Thr1556Asnfs*3	2C	3	not reported		resolved by expert review	yes	no	yes	n/a	no - QCI One expert review resolved
